# Supplementary material for: Assessment of Resistance and Bioremediation Ability ofLactobacillusStrains to Lead and Cadmium
Source: Hindawi journal article supplement (doi:10.1155/2017/9869145), 2017-01-01

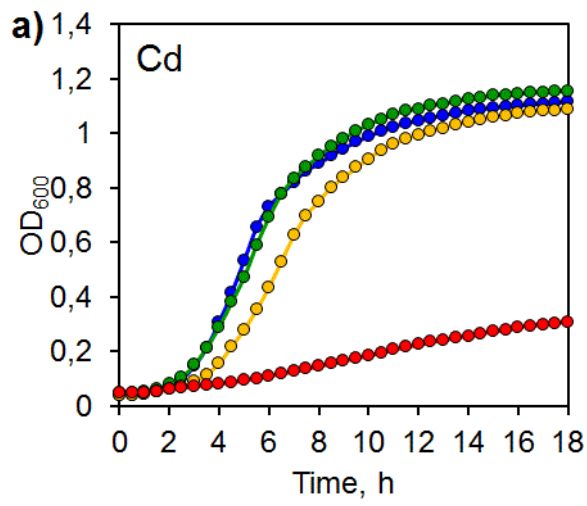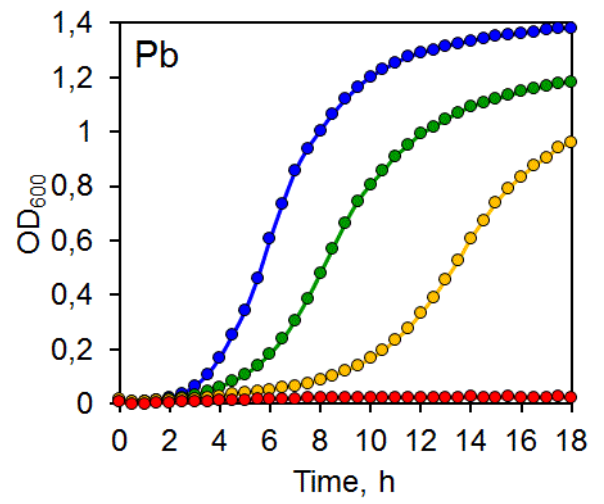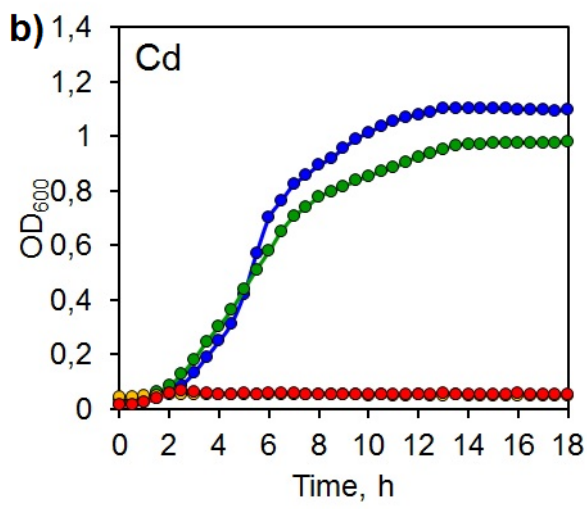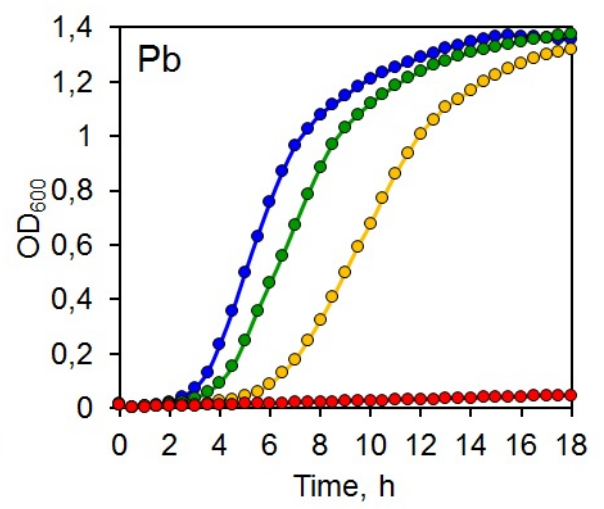

## Supplemental data

Fig. S1. Growth of *Lactobacillus plantarum* 8PA3 (a), *Lactobacillus plantarum* B-578 (b), *Lactobacillus plantarum* S1 (c), *Lactobacillus plantarum* Ga (d) in the presence of Cd or Pb. (●) 0 mg/L; (●) 5 mg/L; (●) 10 mg/L; (●) 50 mg/L.

Fig. S2. Growth of *L. fermentum* Na (a), *L. fermentum* 3-2 (b), *L. fermentum* 3-3 (c) in the presence of Cd or Pb. (●) 0 mg/L; (●) 5 mg/L; (●) 10 mg/L; (●) 50 mg/L.

Fig. S3. Growth of *L. brevis* 20054 (a), *L. buchneri* 20057 (b), *L. rhamnosus* I2L (c) in the presence of Cd or Pb. (●) 0 mg/L; (●) 5 mg/L; (●) 10 mg/L; (●) 50 mg/L.

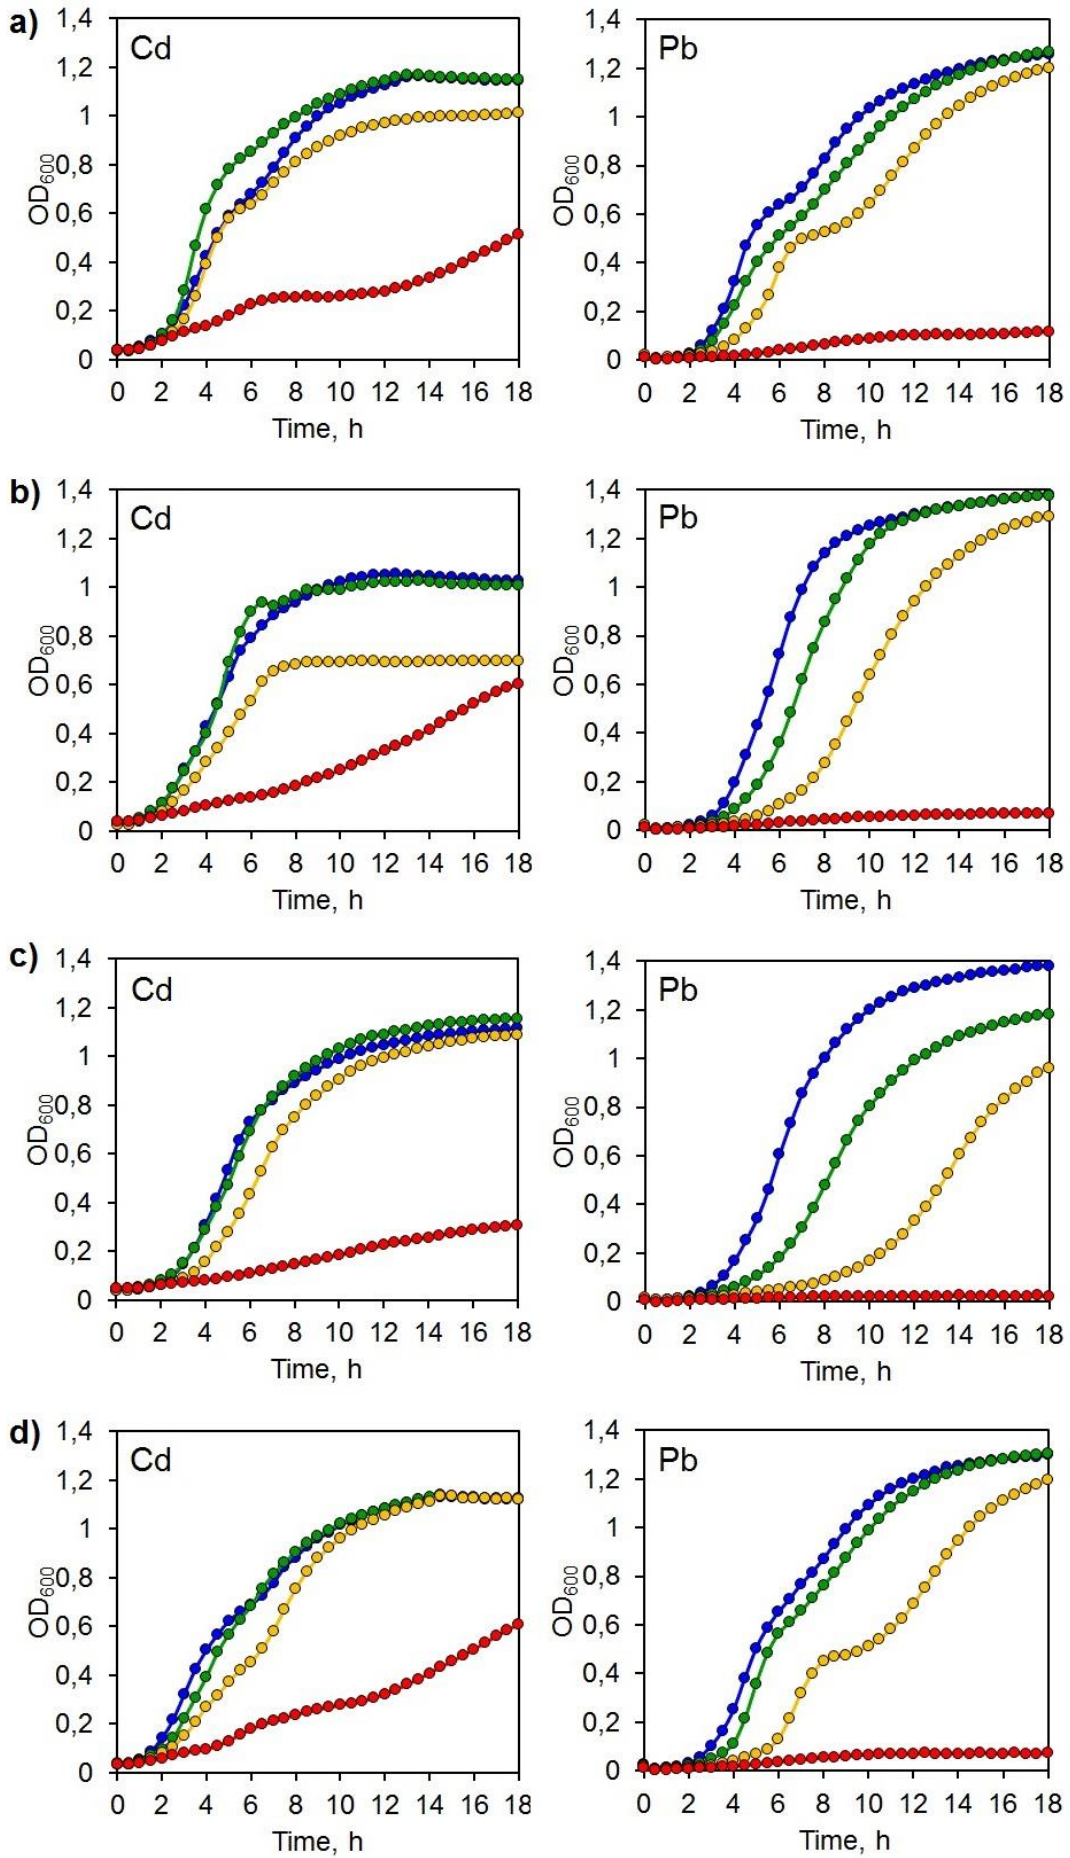

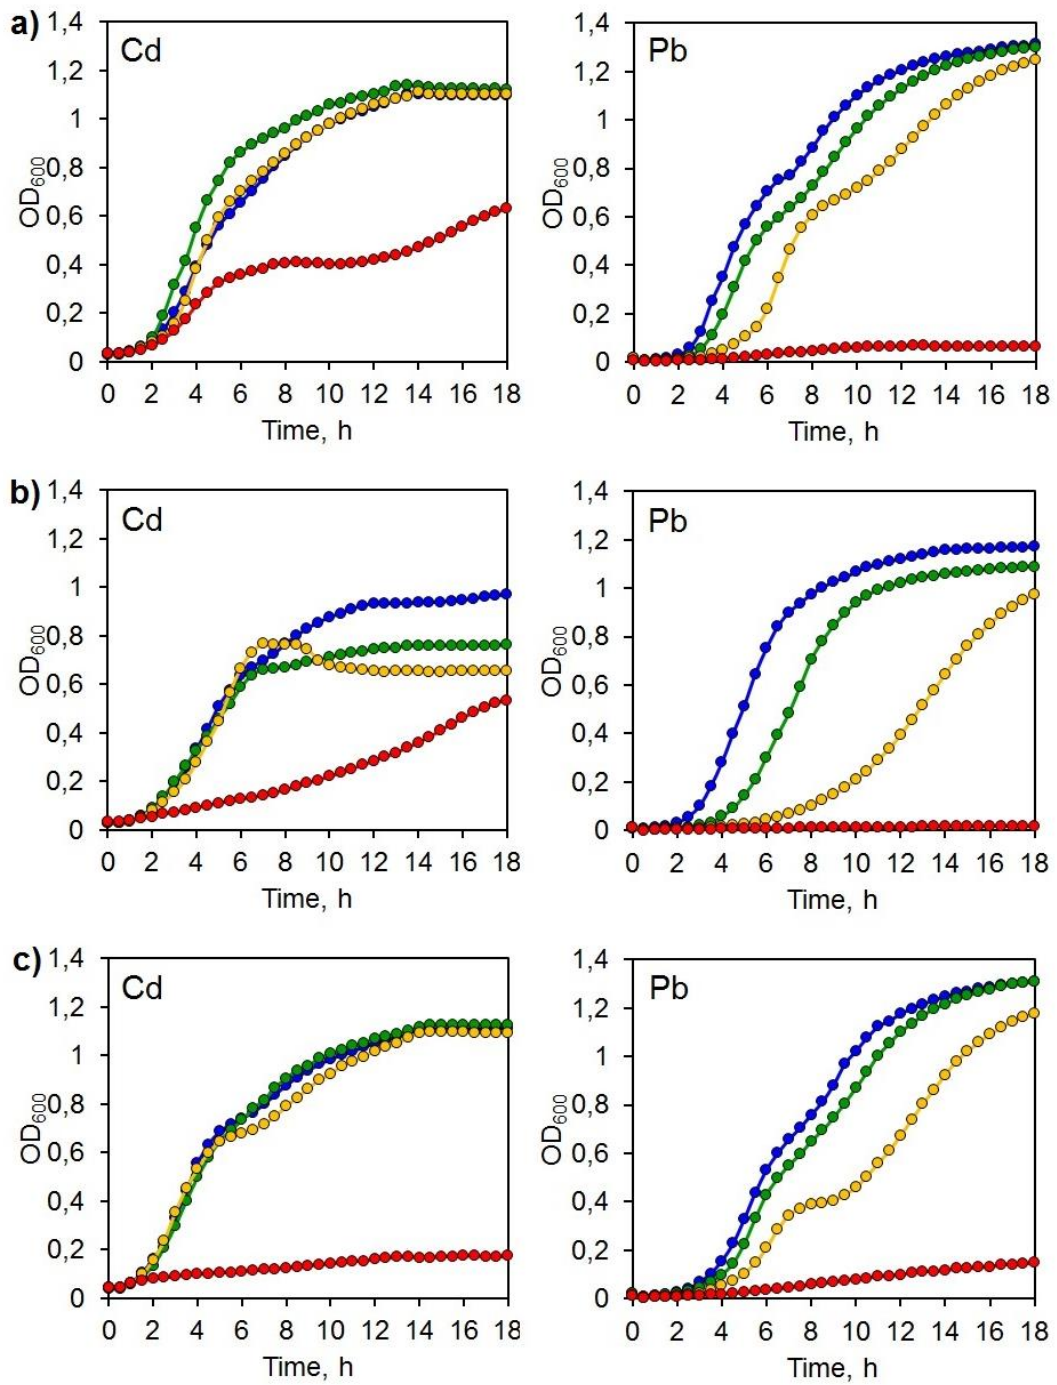

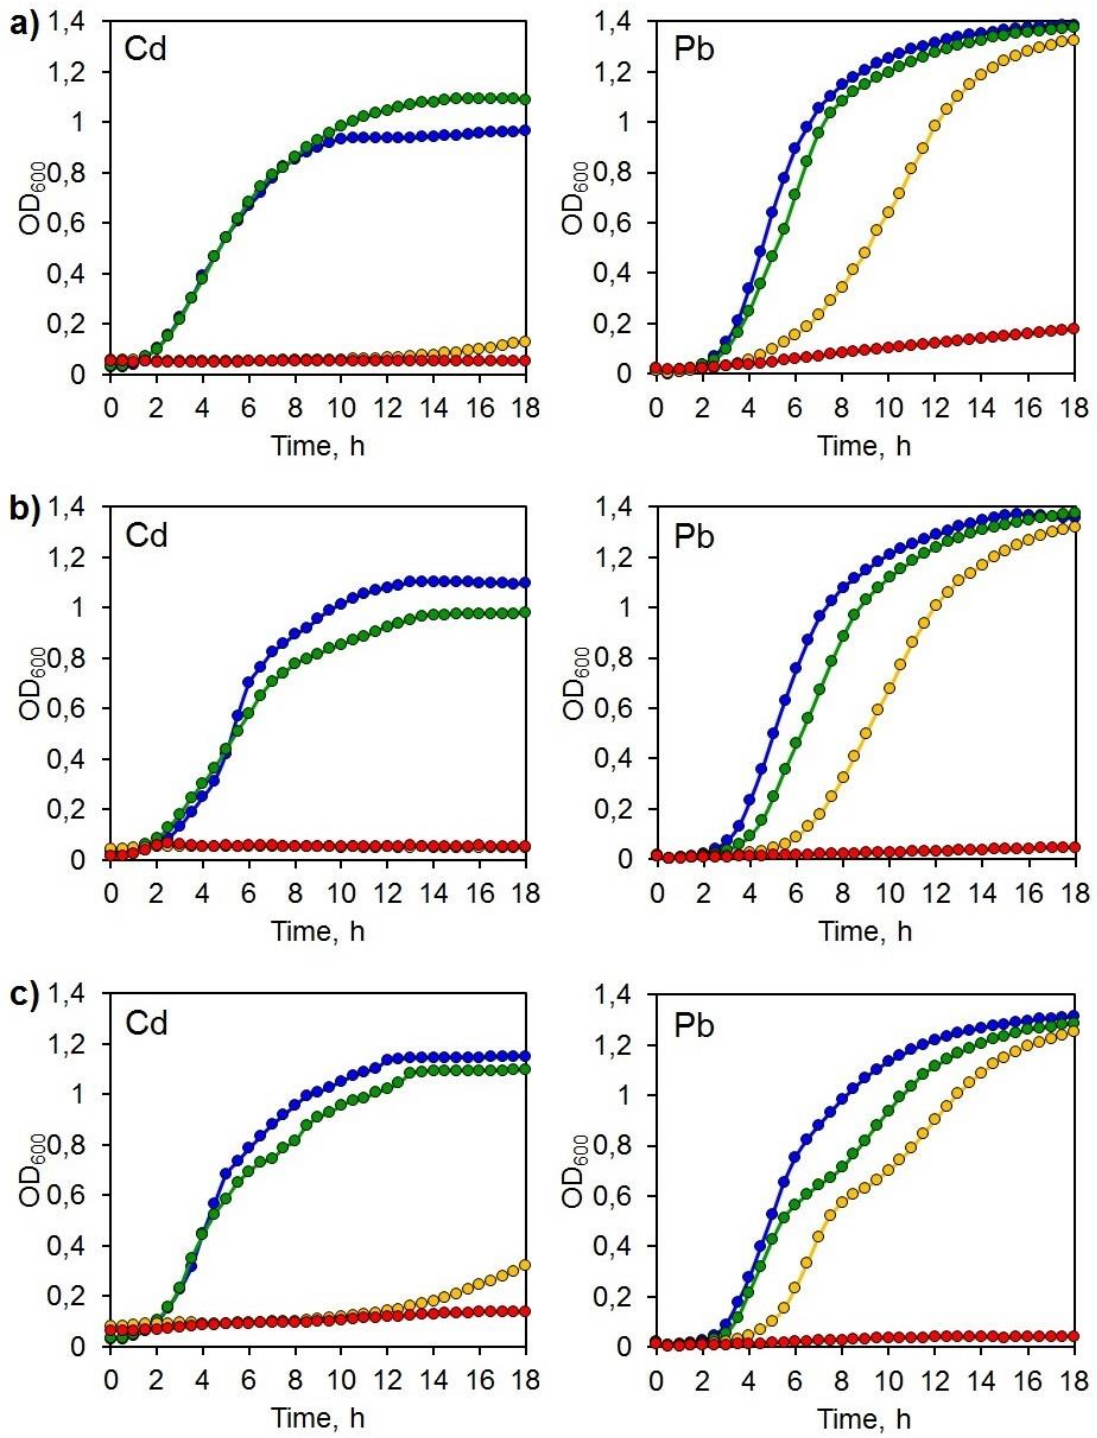

Supplement: f1 [file 9869145.f1.pdf]
